# Supplementary material for: A human immune dysregulation syndrome characterized by severe hyperinflammation with a homozygous nonsense Roquin-1 mutation
Source: PubMed Central journal article supplement (PMC6803705; doi:10.1038/s41467-019-12704-6), 2019-10-21
Supplement: 41467_2019_12704_MOESM1_ESM.pdf [file 41467_2019_12704_MOESM1_ESM.pdf]

Supplementary Information for:

A human immune dysregulation syndrome  
characterized by severe hyperinflammation  
with a homozygous nonsense Roquin-1 mutation

Tavernier SJ et al.

# Supplementary Figure 1

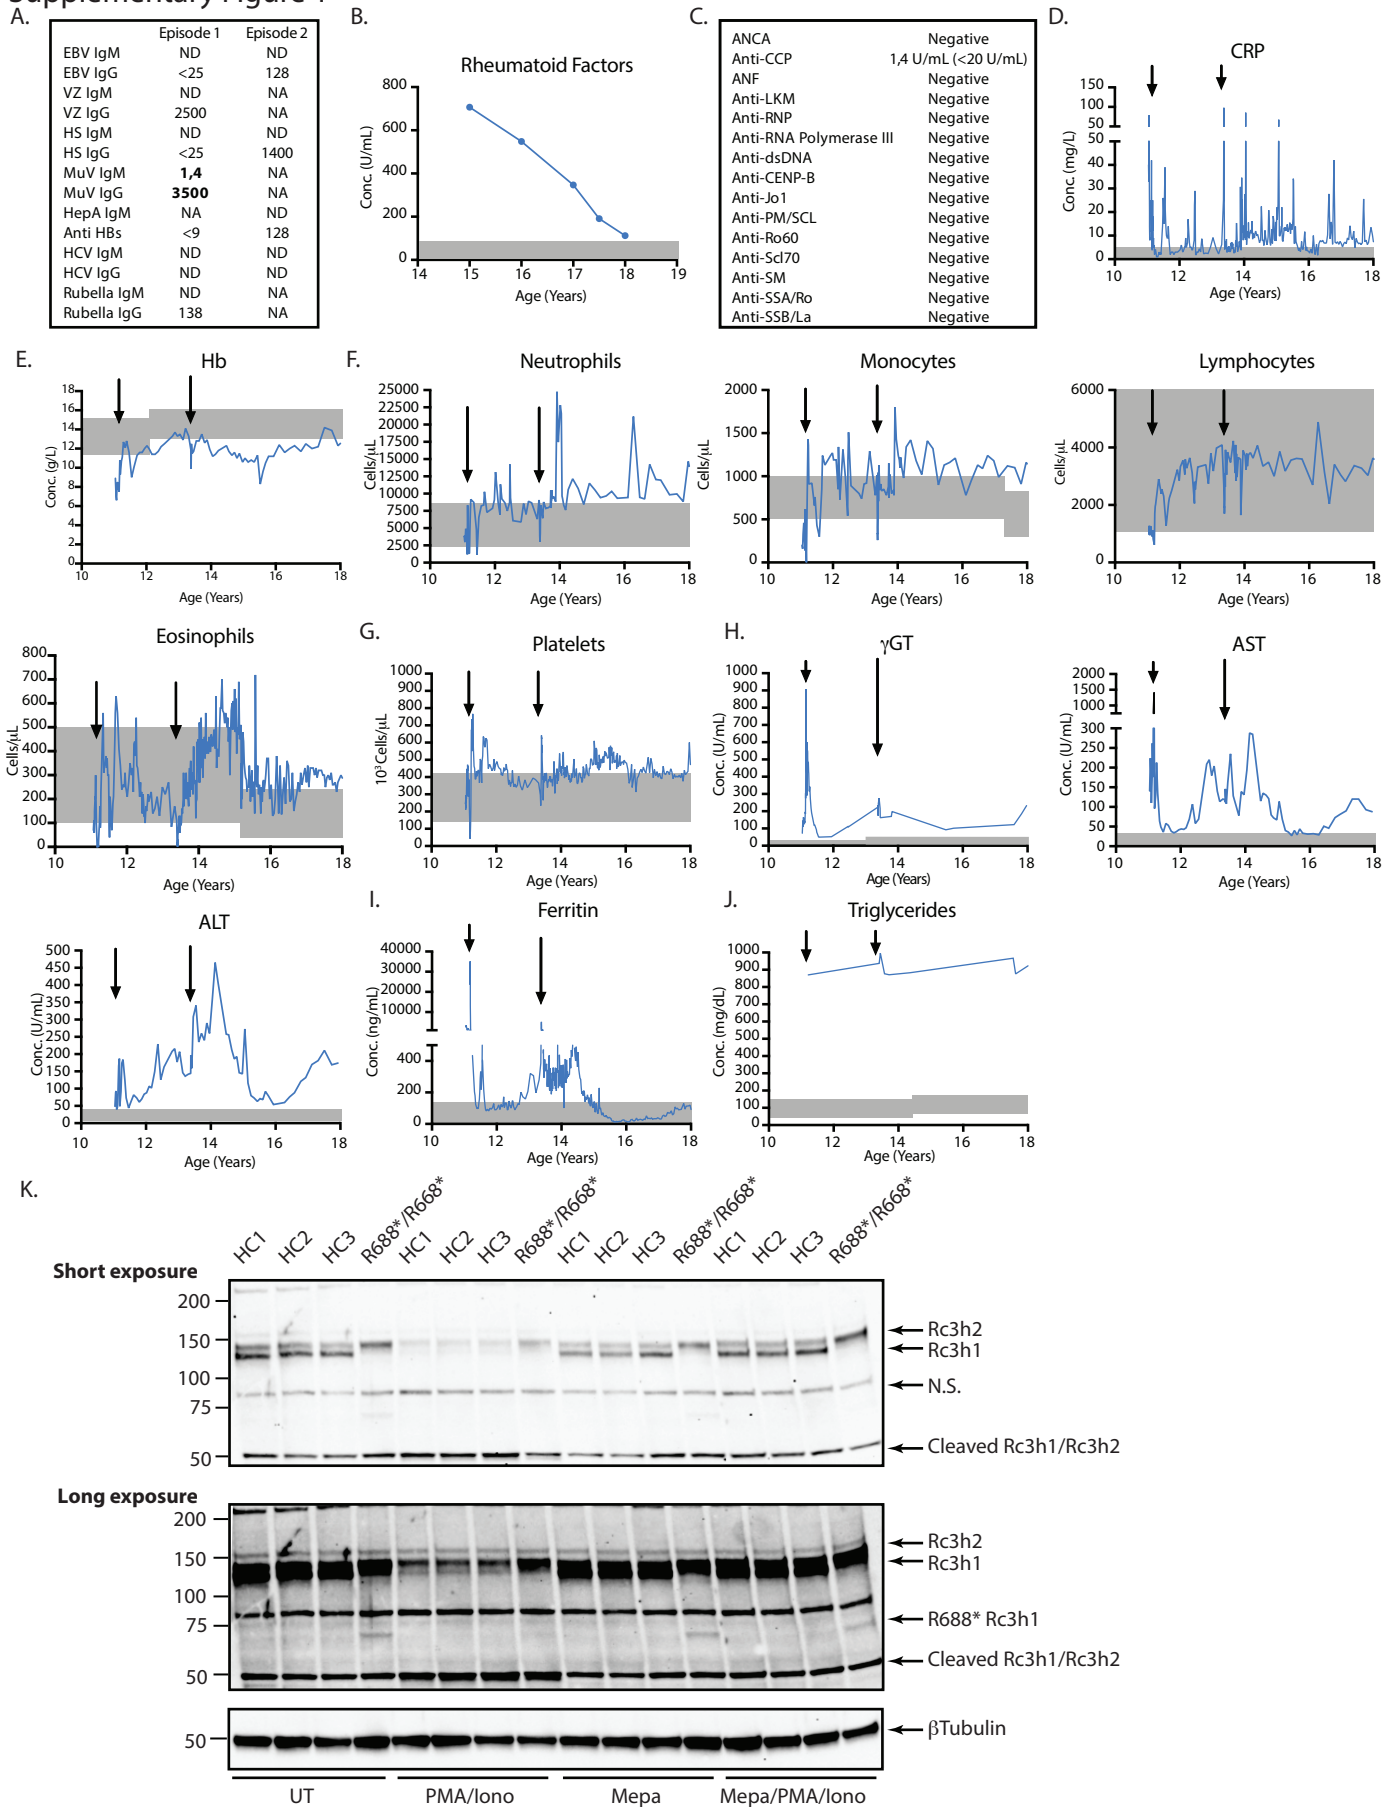

**Supplementary Fig. 1.** (A) Overview of pathogen directed immunoglobulin concentrations measured in the setting of hyperinflammatory episodes. (B) Concentration of rheumatoid factors measured during clinical follow-up. (C) Overview of probed self-antigen directed immunoglobulins. (D-J) Evolution of a number of clinical laboratory parameters. Grey bars depict reference values. CRP: C reactive protein; Hb: hemoglobin;  $\gamma$ GT: gamma glutamyl-transpeptidases; AST: aspartate transaminases; ALT: alanine transaminases. (K) Immunoblot analysis of Roquin-1, its paralog Roquin-2, their cleavage products and the truncated R688\* mutant in T cells of 3 healthy controls (HC) and the R688\*/R688\* proband treated with PMA, ionomycin and/or mepazine.  $\beta$ -Tubulin is used as a loading control. N.S.: nonspecific band. Supp. Fig. 1K is a representative blot for 2 independent experiments.

## Supplementary Figure 2

A.

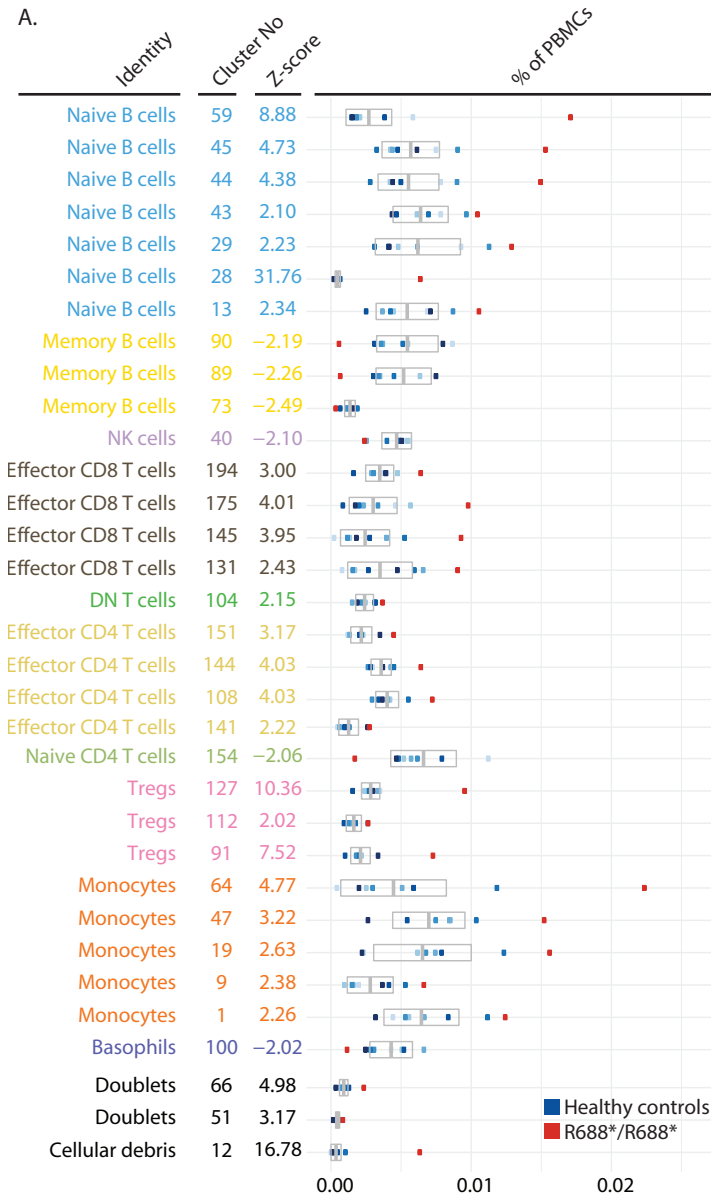

B.

| Age at evaluation (yr)                                                 | 14                        | 17                        |
|------------------------------------------------------------------------|---------------------------|---------------------------|
| <b>Immune cell subsets</b>                                             |                           |                           |
| <b>T cells</b>                                                         |                           |                           |
| CD4 T cells (% of T cells)                                             | 66,7 (61,0 - 74,2)        | 69,6 (67,7 - 87,0)        |
| Naïve (% of CD4 <sup>+</sup> )                                         | 54,7 (34,1 - 71,2)        | <b>53,0</b> (54,0-71,0)   |
| CM (% of CD4 <sup>+</sup> )                                            | 32,9 (22,8-54,1)          | 27,2 (18,7-35,0)          |
| EM (% of CD4 <sup>+</sup> )                                            | 11,0 (5,9 - 19,5)         | 16,2 (8,7-12,2)           |
| EMRA (% of CD4 <sup>+</sup> )                                          | <b>1,4</b> (0,1 - 1,0)    | <b>3,6</b> (0,9-2,1)      |
| CXCR5 <sup>+</sup> (% of CD4 <sup>+</sup> )                            | 9,3 (4,5 - 13,0)          | 3,2 (2,6-5,4)             |
| CD25 <sup>+</sup> CD127 <sup>-</sup> (% of CD4 <sup>+</sup> )          | <b>16,5</b> (4,2 - 7,1)   | <b>19,9</b> (6,5-12,2)    |
| CCR4 <sup>-</sup> CXCR3 <sup>+</sup> (% of CD4 <sup>+</sup> )          | NA                        | 3,8 (3,5-10,2)            |
| CCR4 <sup>+</sup> CCR6 <sup>+</sup> (% of CD4 <sup>+</sup> )           | NA                        | <b>6,4</b> (0,6-3,5)      |
| IFN $\gamma$ <sup>+</sup> (% of CD45RO <sup>+</sup> CD4 <sup>+</sup> ) | 25,9 (19,0 - 47,1)        | NA                        |
| IL-17A <sup>+</sup> (% of CD45RO <sup>+</sup> CD4 <sup>+</sup> )       | <b>3,3</b> (0,2 - 2,0)    | NA                        |
| <b>CD8 T cells (% of T cells)</b>                                      |                           |                           |
| Naïve (% of CD8 <sup>+</sup> )                                         | 27,8 (27,0 - 35,5)        | 30,4 (22,0 - 32,3)        |
| CM (% of CD8 <sup>+</sup> )                                            | 42,6 (29,4 - 73,2)        | <b>34,7</b> (40,0 - 58,1) |
| EM (% of CD8 <sup>+</sup> )                                            | 10,0 (6,5 - 15,8)         | 9,8 (6,0 - 8,5)           |
| EMRA (% of CD8 <sup>+</sup> )                                          | 30,4 (10,4 - 45,5)        | 37,6 (28,8 - 39,9)        |
| CD4 <sup>+</sup> CD8 <sup>+</sup> (% of CD8 <sup>+</sup> )             | <b>3,7</b> (0,7-1,4)      | <b>11,6</b> (2,1-5,0)     |
| PD1 <sup>+</sup> (% of CD8 <sup>+</sup> )                              | NA                        | <b>11,6</b> (2,5 - 7,4)   |
| IFN $\gamma$ <sup>+</sup> (% of CD45RO <sup>+</sup> CD4 <sup>+</sup> ) | <b>95,0</b> (41,7 - 90,8) | NA                        |
| <b>B cells (% of PBMCs)</b>                                            |                           |                           |
| Naïve (% of Bs)                                                        | <b>18,3</b> (4,5-15,4)    | <b>13,3</b> (3,9-7,4)     |
| Transitional (% of Naïve Bs)                                           | <b>91,0</b> (38,3 - 79,0) | <b>94,4</b> (51,0 - 71,1) |
| IgM <sup>+</sup> memory (% of Bs)                                      | 4,3 (1,0 - 4,4)           | 2,5 (4,1-20,9)            |
| IgM <sup>+</sup> memory (% of Bs)                                      | <b>2,4</b> (7,3 - 15,9)   | <b>1,9</b> (12,2-19,3)    |
| IgM <sup>+</sup> memory (% of Bs)                                      | <b>1,4</b> (13,2 - 40,6)  | <b>1,0</b> (10,3-20,3)    |
| CD21 <sup>low</sup> (% of Bs)                                          | <b>7,34</b> (0,7-7,21)    | NA                        |
| <b>NK cells (% of PBMCs)</b>                                           |                           |                           |
| CD56 <sup>hi</sup> (% of NKs)                                          | 9,6 (3,2 - 10,8)          | 8,4 (4,8 - 12,7)          |
| CD16 <sup>+</sup> CD56 <sup>hi</sup> (% of NKs)                        | <b>2,5</b> (3,3 - 21,6)   | <b>1,2</b> (2,1 - 8,4)    |
| CD16 <sup>+</sup> CD56 <sup>dim</sup> (% of NKs)                       | 1,8 (0,6 - 3,6)           | 0,3 (0,5 - 2,0)           |
| CD16 <sup>+</sup> CD56 <sup>dim</sup> (% of NKs)                       | 94,1 (79,6 - 90,6)        | 93,3 (85,0 - 93,2)        |
| <b>Monocytes (% of PBMCs)</b>                                          |                           |                           |
| CD14 <sup>+</sup> (% of Monos)                                         | 15,0 (3,8 - 27,3)         | <b>29,8</b> (24,4-27,4)   |
| CD16 <sup>+</sup> (% of Monos)                                         | <b>86,3</b> (91,3 - 98,3) | 78,5 (71,5-83,0)          |
| CD16 <sup>+</sup> (% of Monos)                                         | <b>13,5</b> (1,9 - 8,7)   | 12,1 (4,6-15,5)           |
| <b>DCs (% of PBMCs)</b>                                                |                           |                           |
| cDCs (% of DCs)                                                        | 1,7 (1,3 - 3,4)           | <b>0,9</b> (1,3-2,1)      |
| pDCs (% of DCs)                                                        | 90,5 (56,3 - 85,8)        | 56,6 (41,1 - 53,2)        |
| pDCs (% of DCs)                                                        | <b>8,0</b> (13,2 - 41,6)  | <b>28,6</b> (30,9 - 48,6) |
| <b>Basophils (% of PBMCs)</b>                                          |                           |                           |
|                                                                        | 0,5 (0,2 - 1,4)           | <b>0,4</b> (0,5-1,6)      |
| <b>NKTs (% of PBMCs)</b>                                               |                           |                           |
| iNKTs (% of NKTs)                                                      | 0,8 (0,8 - 2,4)           | <b>0,8</b> (2,4 - 5,0)    |
|                                                                        | 2,8 (0,6 - 3,2)           | <b>4,1</b> (5,6-6,7)      |

C.

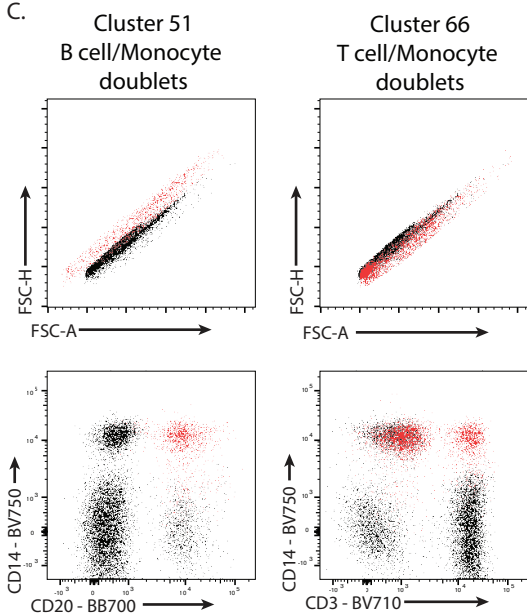

D.

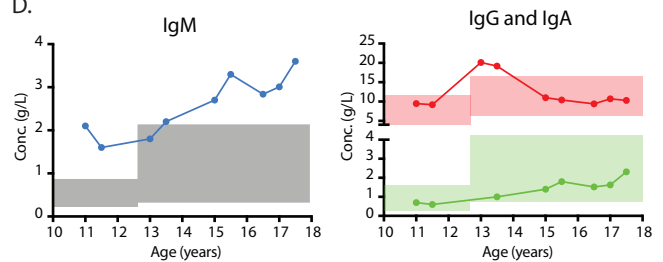

E.

| Age (yr) | 11                      | 15                     |
|----------|-------------------------|------------------------|
| IgG      | 9,5 (4,70-11,9)         | 10,4 (7,0-16,0)        |
| IgG2     | <b>0,56</b> (0,85-4,10) | <b>0,91</b> (1,06-6,1) |
| IgG3     | 0,301 (0,15-1,49)       | 0,445 (0,18-1,163)     |
| IgE      | <4,4 (0-200)            | <4,4 (0-200)           |

**Supplementary Fig. 2. (A)** Boxplots and individual datapoints of immune cell clusters with a Z-score higher or lower than 2 or -2 of the R688\*/R688\* proband and healthy controls (HCs). Color code matches annotated immune cell population. **(B)** Immunological characterization of R688\*/R688\* proband at the age of 14yrs and 17yrs old. Values between brackets represent the minima and maxima values of a cohort of healthy controls (HCs; n>4). **(C)** 2D scatter plots of cluster 51 and 66 identifying cell doublets on FSC-A by FSC-H and CD14 by CD20 or CD3 by CD20, respectively. Data from specific cluster (red) and viable cells (black) are shown. **(D)** Evolution of serum immunoglobulin (Ig) M (blue), G (red) and A (green) concentration in R688\*/R688\* proband. Reference values are shown as greyed bars. **(E)** Concentration of IgG subtypes IgG2 and IgG3 and IgE in the proband at the age of 11 and 15 years. Reference values are given between brackets.

## Supplementary Figure 3

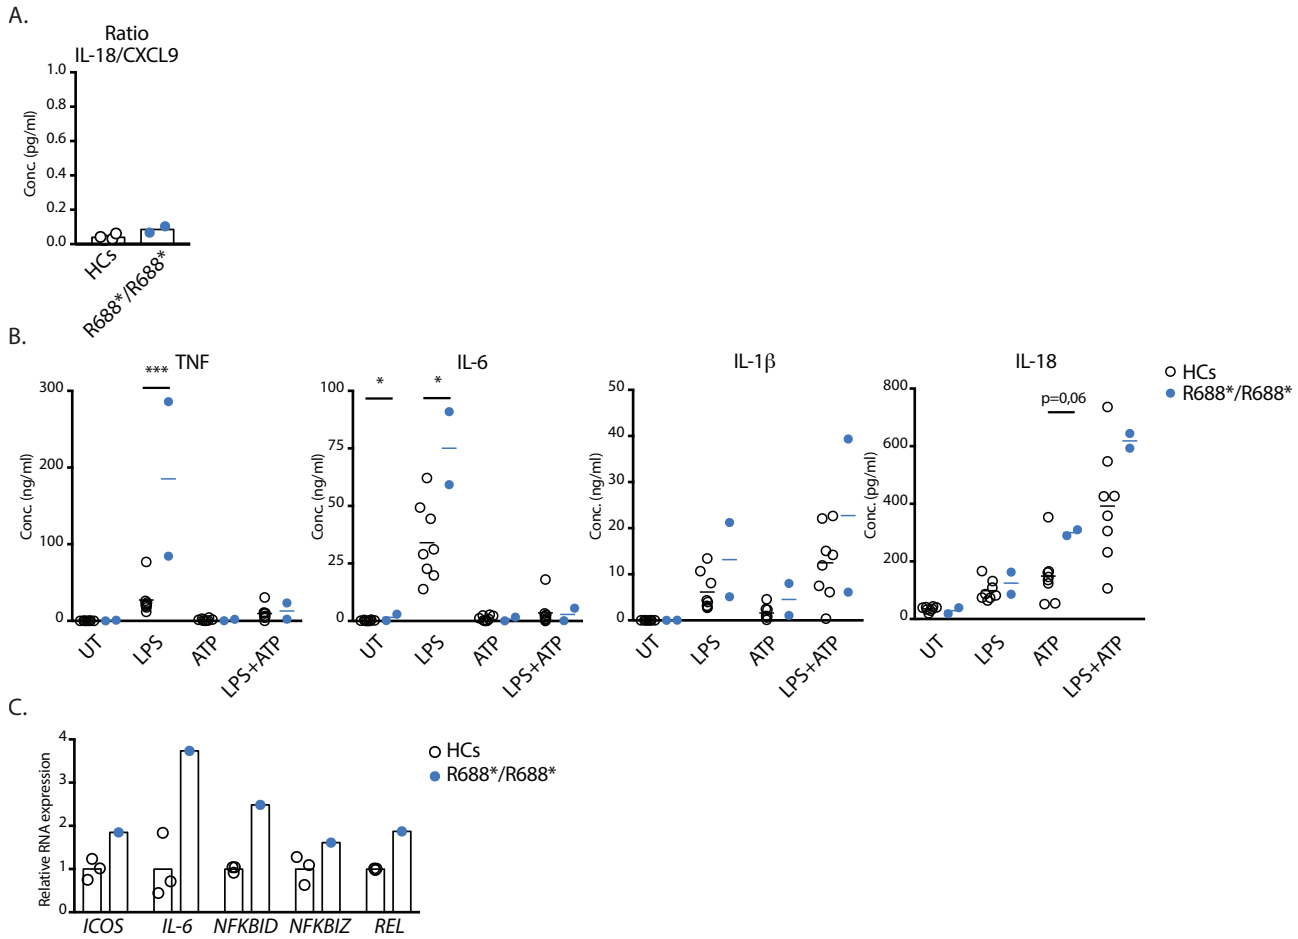

**Supplementary Fig. 3.** (A) Scatter plot displaying mean ratio of serum concentrations of IL-18 over CXCL9 in R688\*/R688\* proband (n=2) and healthy controls (HCs; n=4). (B) IL-1 $\beta$ , IL-18, IL-6 and TNF concentration in the supernatant of monocytes of the R688\*/R688\* proband (n=2) or healthy controls (HCs; n=8) treated with ATP (5mM) or LPS (100ng/ml). \*= $p < 0.05$ ; \*\*\*= $0.001 < p < 0.0001$  (unpaired t-test). Mean concentration is shown. (C) Relative expression of mRNA transcripts of *ICOS*, *IL-6*, *NFKBID*, *NFKBIZ* and *REL* in T cells derived from the R688\*/R688\* proband or healthy controls (n=3). Data was normalized using the housekeeping genes *HPRT* and *GAPDH*. Mean relative expression is shown. Data is accumulated from 2 different timepoints (Suppl. Fig. 3A), 2 independent experiments (Suppl. Fig. 3B), or is representative of 2 independent experiments (Suppl. Fig. 3C).

## Supplementary Figure 4

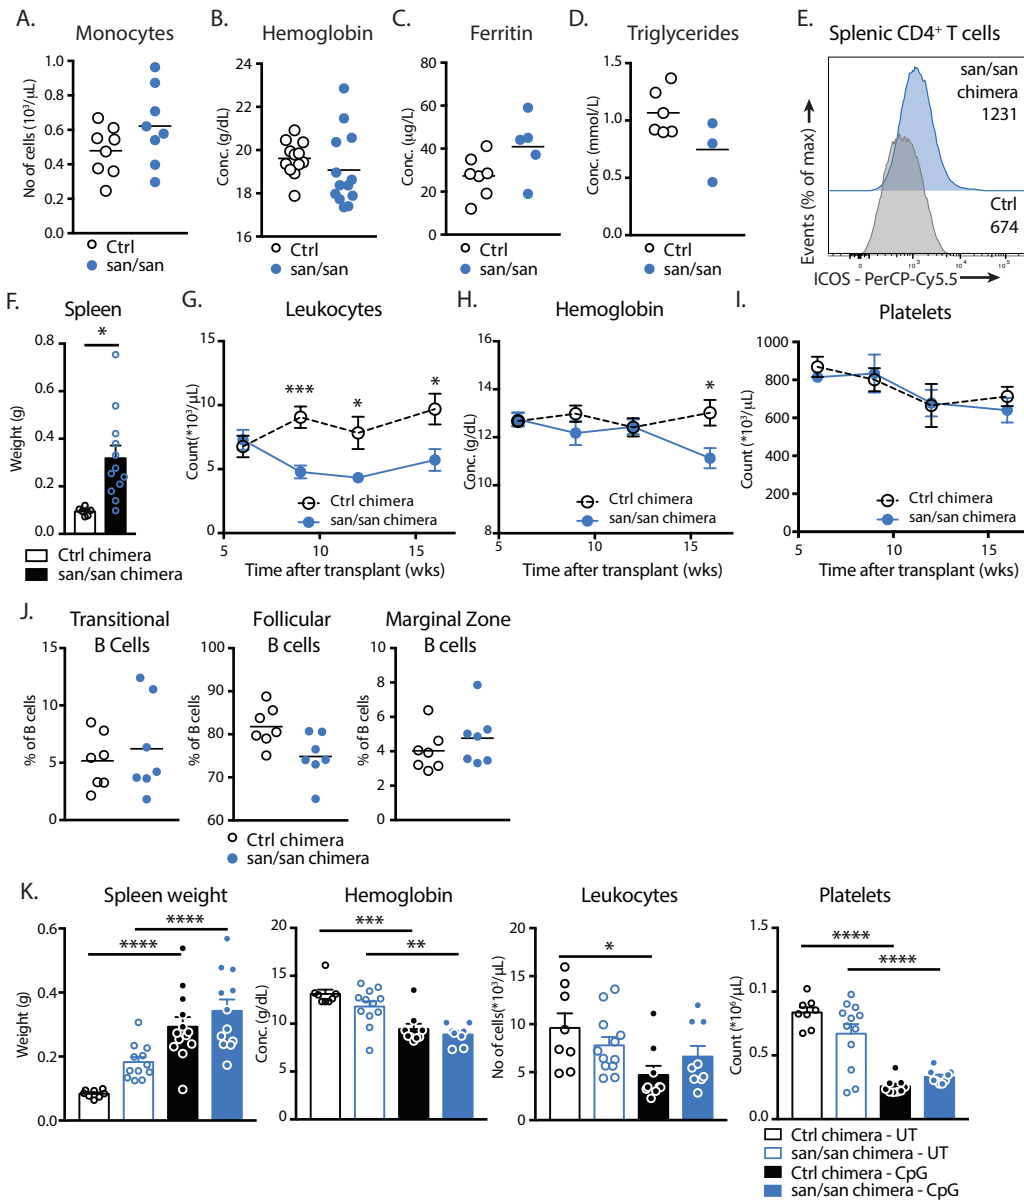

**Supplementary Fig. 4.** (A) Mean concentration of blood monocytes in sanroque mice (n=8) and littermate controls (n=8). (B) Mean concentration of hemoglobin in littermate controls (n=12) and sanroque mice (n=13). (C) Mean ferritin concentration in sanroque mice (n=5) and littermate controls (n=7). (D) Mean triglyceride concentration in controls (n=6) and sanroque mice (n=3). (E) Representative histogram of ICOS expression in CD4<sup>+</sup> T cells chimeras reconstituted with sanroque or control bone marrow cells. (F) Spleen weight in chimeric mice reconstituted with sanroque (n=12) or control bone marrow cells (n=6). \* $p < 0.05$  (unpaired t-test). Bar graph show mean and SEM. (G-I) Evolution of leukocytes, hemoglobin and platelets in chimeric mice reconstituted with sanroque (n=16) or control (n=10) bone marrow. \* $p < 0.05$ ; \*\*\* $= 0.001 < p < 0.0001$  (unpaired t-test). Mean and SEM are given. (J) B cell maturation in chimeric mice reconstituted with sanroque (n=7) or control bone marrow (n=7). Scatter dot plot with mean. (K) Quantification of spleen weight, hemoglobin, leukocytes and thrombocytes of sanroque ( $n^{\text{vehicle}}=12$ ,  $n^{\text{CpG}}=9$ ) and control ( $n^{\text{vehicle}}=8$ ,  $n^{\text{CpG}}=9$ ) chimeric mice treated with vehicle or CpG. \* $p < 0.05$ ; \*\* $= p < 0.01$ ; \*\*\*\* $= p < 0.0001$  (one-way ANOVA with Tukey's correction). Bar graph depict mean and SEM. Data is representative of 1 (Suppl. Fig. 4C, D) or 2 independent experiments (Suppl. Fig. 4E, J) or represents accumulated data of 2 (Suppl. Fig. 4A, B, F, K) or 3 (Suppl. Fig. 4G-I) independent experiments.

## Supplementary Figure 5

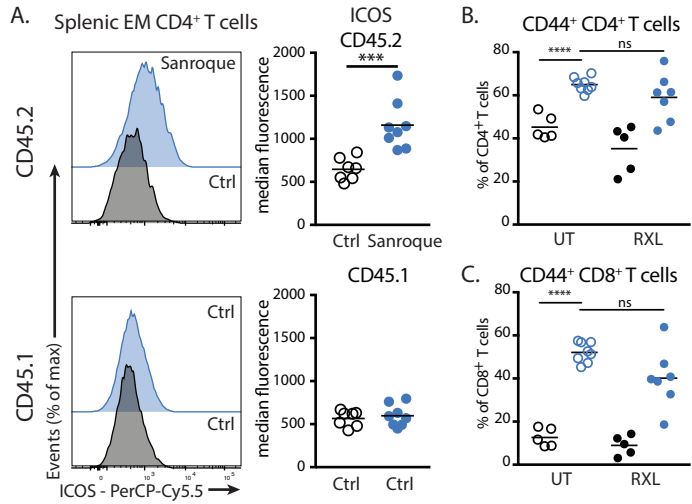

**Supplementary Fig. 5. (A)** Representative histogram and scatter dot plots of mean ICOS expression in CD4<sup>+</sup> T cells of mixed bone marrow chimeras reconstituted with sanroque (n=7) or control CD45.2 (n=8) and control CD45.1 mice. \*\*\*=0.001<p<0.0001 (unpaired t-test). **(B)** Quantification of CD44<sup>+</sup> CD4<sup>+</sup> and CD8<sup>+</sup> T cells in sanroque (n<sup>vehicle</sup>=8, n<sup>RXL</sup>=7) and control (n<sup>vehicle</sup>=5, n<sup>RXL</sup>=5) chimeric mice treated with vehicle or RXL. \*=p<0.05; \*\*=p<0.01; \*\*\*\*=p<0.0001 (one-way ANOVA with Tukey's correction). Scatter dot plot with mean is plotted.

## Supplementary Figure 6

### A. HEK293T

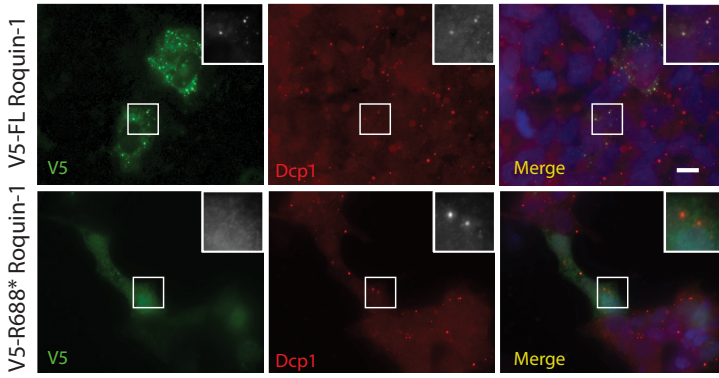

### B. Murine T cells

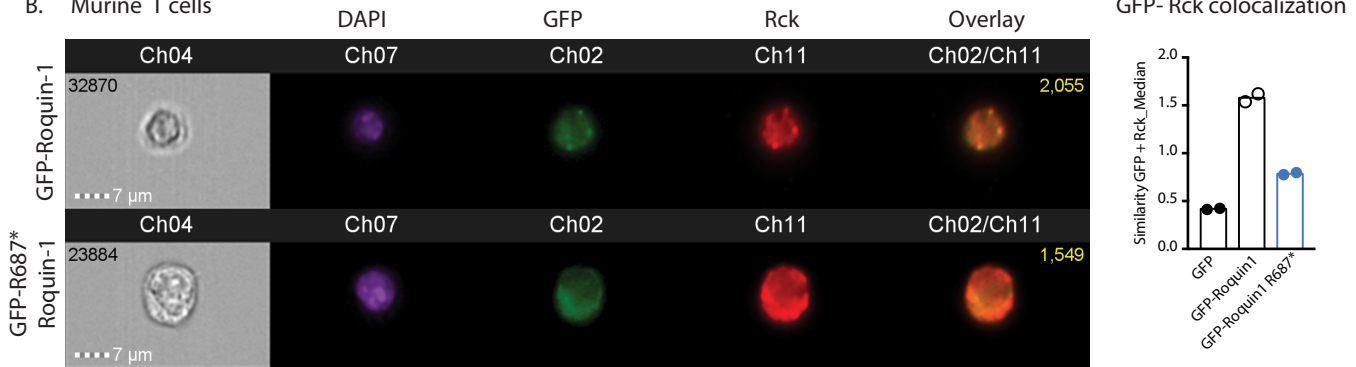

### C. HEK293T + Sodium Arsenite

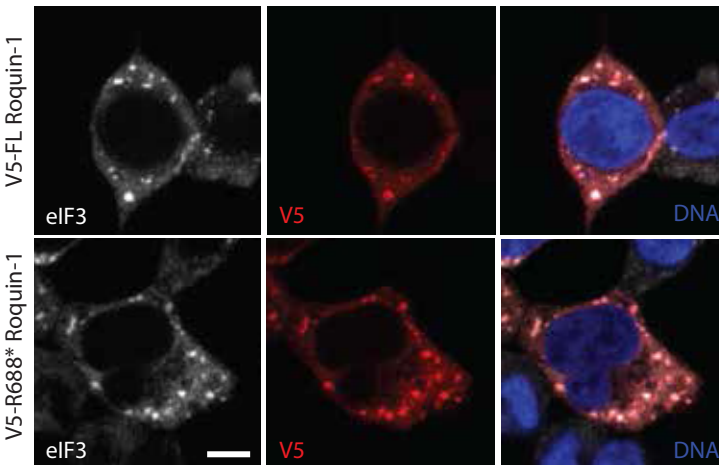

### D.

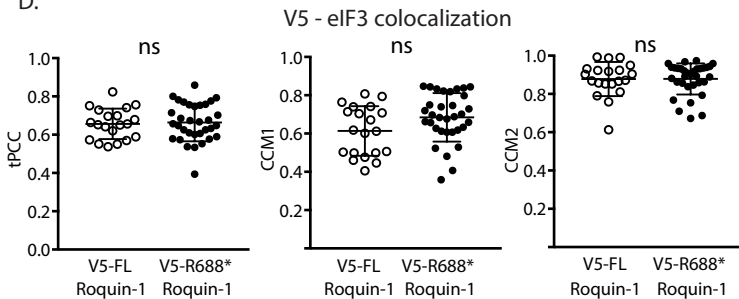

**Supplementary Fig. 6. (A)** HEK293T cells were transiently transfected with V5 tagged Roquin-1 (V5-FLRoquin-1) or the V5-R688\* Roquin-1 variant and subsequently stained with anti-V5 and anti-Dcp1 (P-body marker). Nuclei were revealed using Hoechst. Scale bar = 10 $\mu$ M. **(B)** 4-OHT treated murine Rc3h1-2<sup>fl/fl</sup>; CD4-CreERT2; rtTA CD4<sup>+</sup> T cells were retrovirally transduced doxycycline inducible constructs encoding GFP fused WT or R687\* Roquin-1. After 16h stimulation with doxycycline, cells were stained with anti-Rck (P-body marker) and DAPI. Correlation of GFP and Rck fluorescent signal was calculated using the Similarity Bright Detail Feature. **(C)** HEK293T cells were transiently transfected with V5 tagged Roquin-1 (V5-FLRoquin-1) or the V5-R688\* Roquin-1 variant, treated with arsenite and subsequently stained with anti-V5 and anti-eIF3 (Stress granule marker). Nuclei were revealed using Hoechst. Scale bar = 10 $\mu$ M. **(D)** Correlation analysis of endogenous eIF3 and Roquin-1 comparing HEK293T cells transfected with V5-FLRoquin-1 and V5-R688\* Roquin-1. tPCC: thresholded Pearson correlation coefficient; CCM1/2: Manders coefficient1/2. Mean and standard deviation are plotted. Data shown is representative of 1 (Suppl. Fig. 6A), 2 (Suppl. Fig. 6B) or 3 (Suppl. Fig. 6C, D) independent experiments.





## Supplementary Figure 8

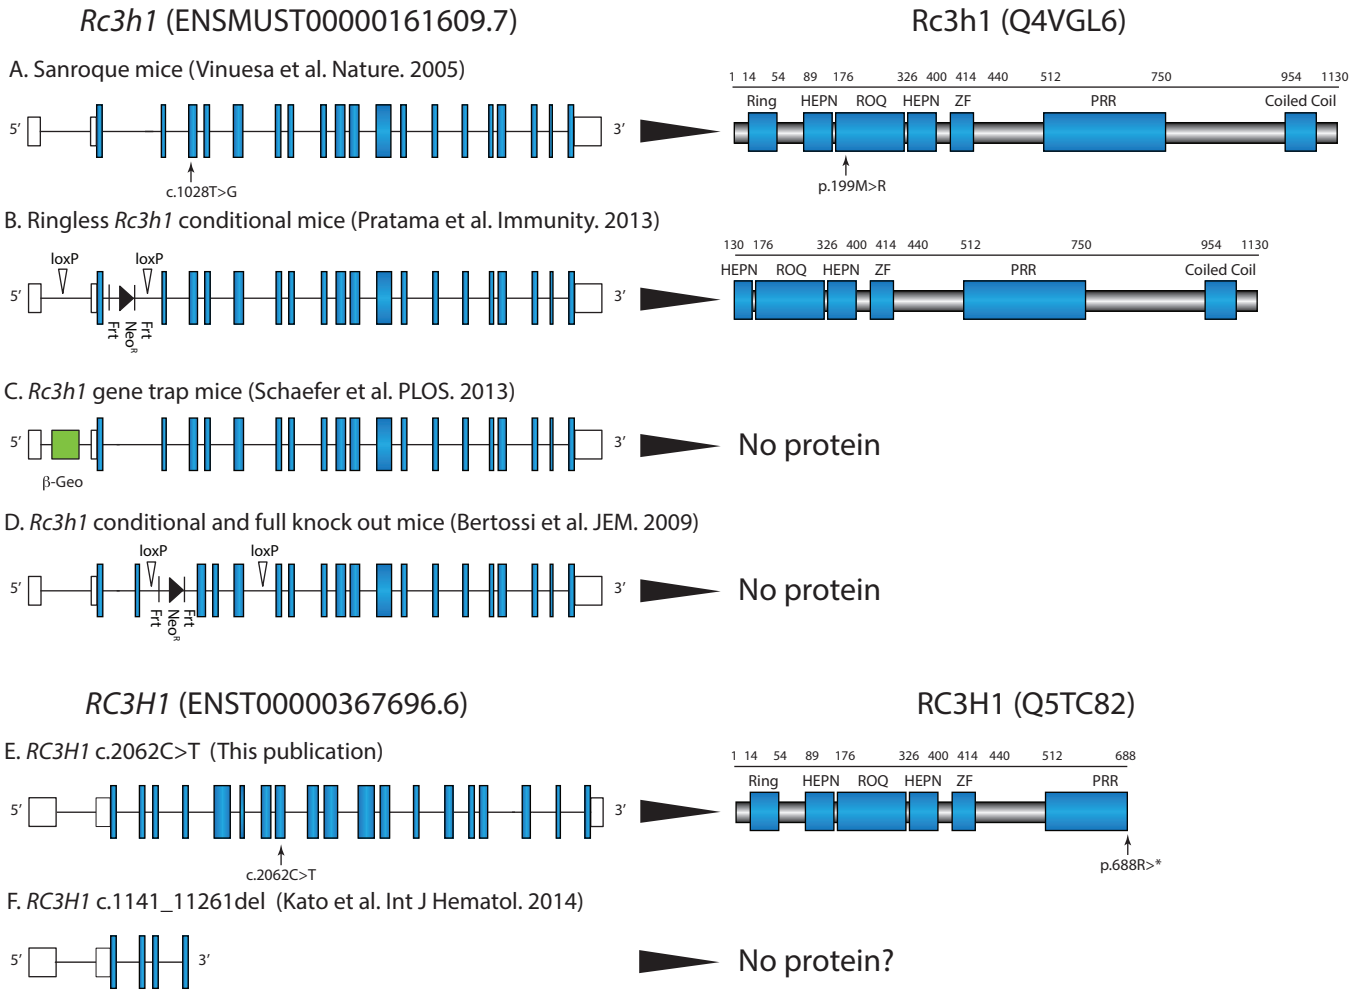

**Supplementary Fig. 8. (A-D)** Graphical representation of the consequences on transcript and protein level of described murine *Rc3h1* mutants and **(E,F)** reported human *RC3H1* variants.

# Supplementary Figure 9

A

## Spleen

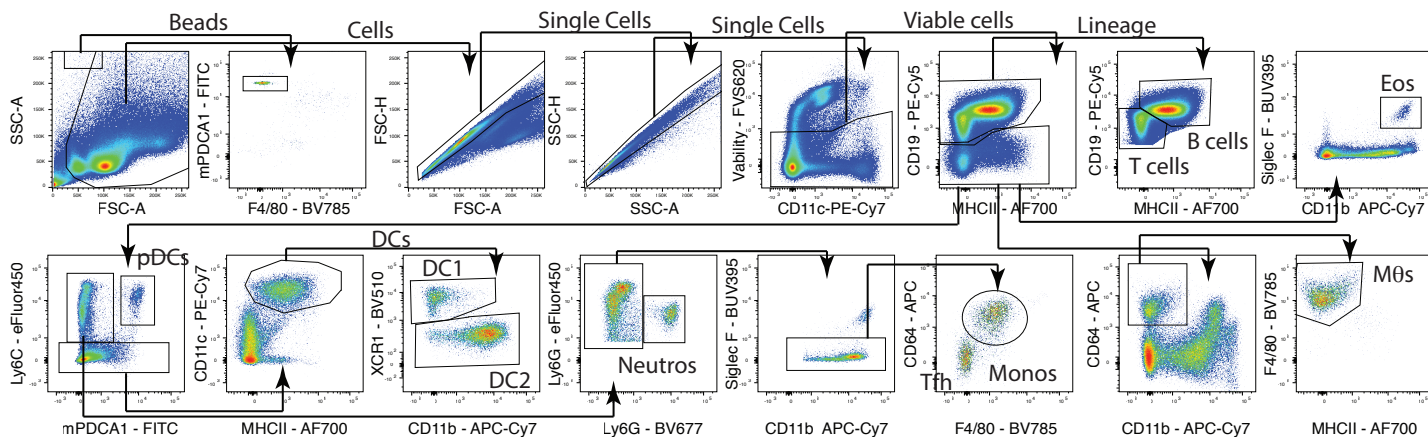

B

## Spleen

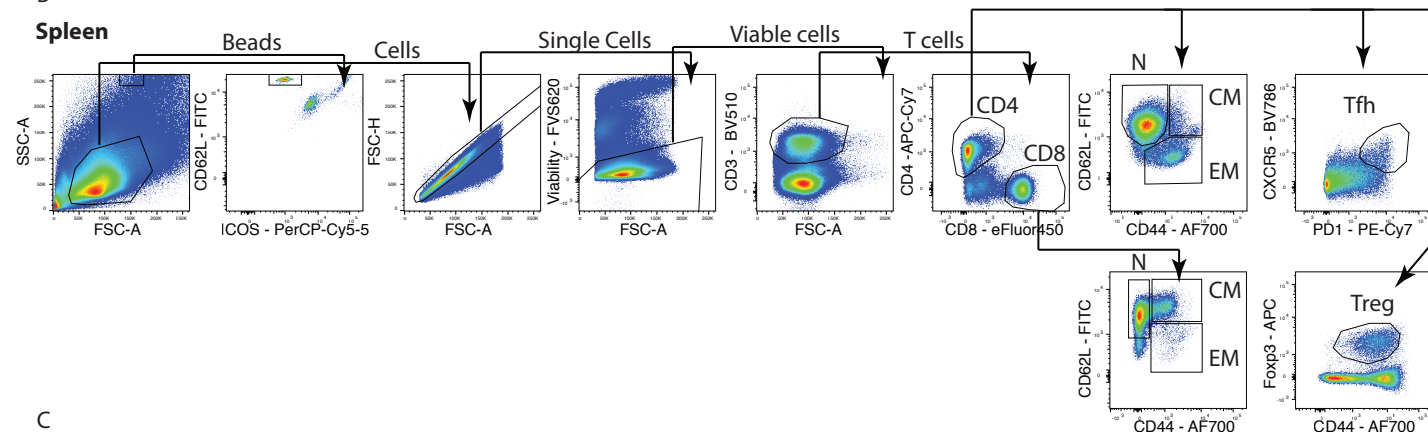

C

## Spleen

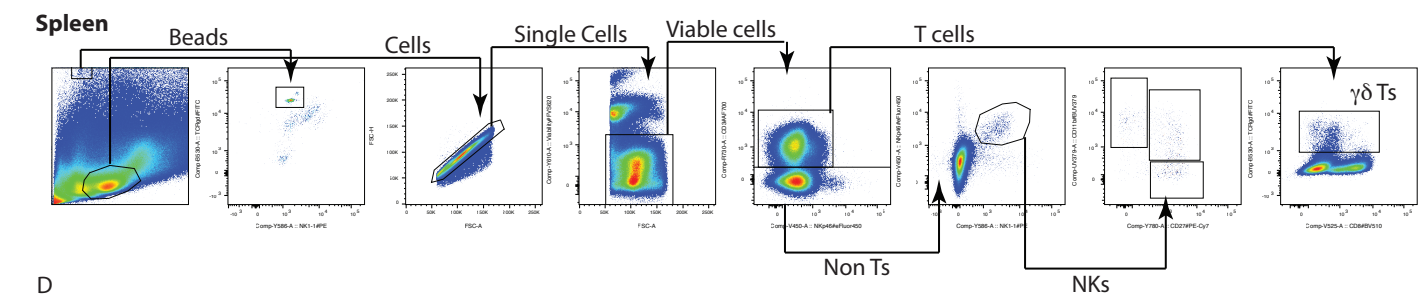

D

## Liver

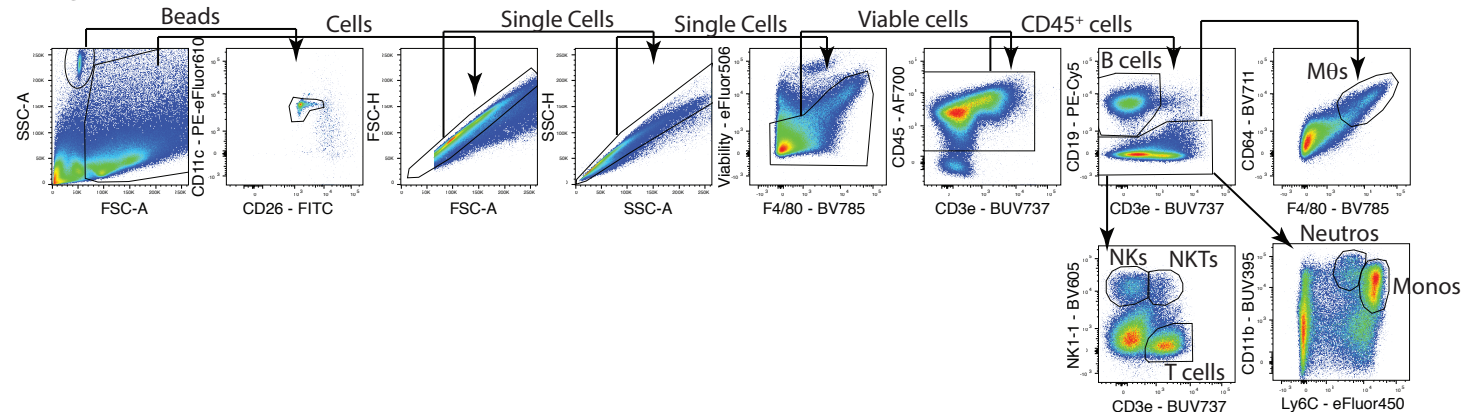

**Supplementary Fig. 9. (A-D)** Gating strategies of analyzed immune cell populations presented in Figure 4 and Supplementary Figure 4. N: Naive, CM: Central Memory, EM: Effector Memory, Fol: Follicular, MZB: Marginal Zone B cells, MZP: Marginal Zone Plasmablasts, T: Transitional, F: Follicular, EOs: Eosinophils, M0s: Macrophages, Tfh: Follicular T helper cell, Treg: Regulatory T cell, DC: Dendritic Cell.

Supplementary Figure 10

A

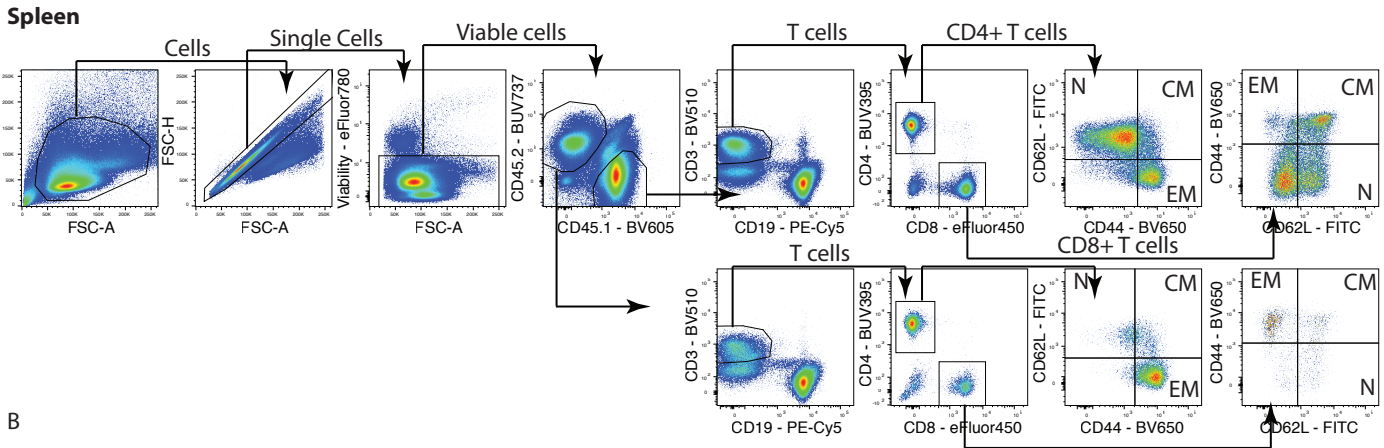

B

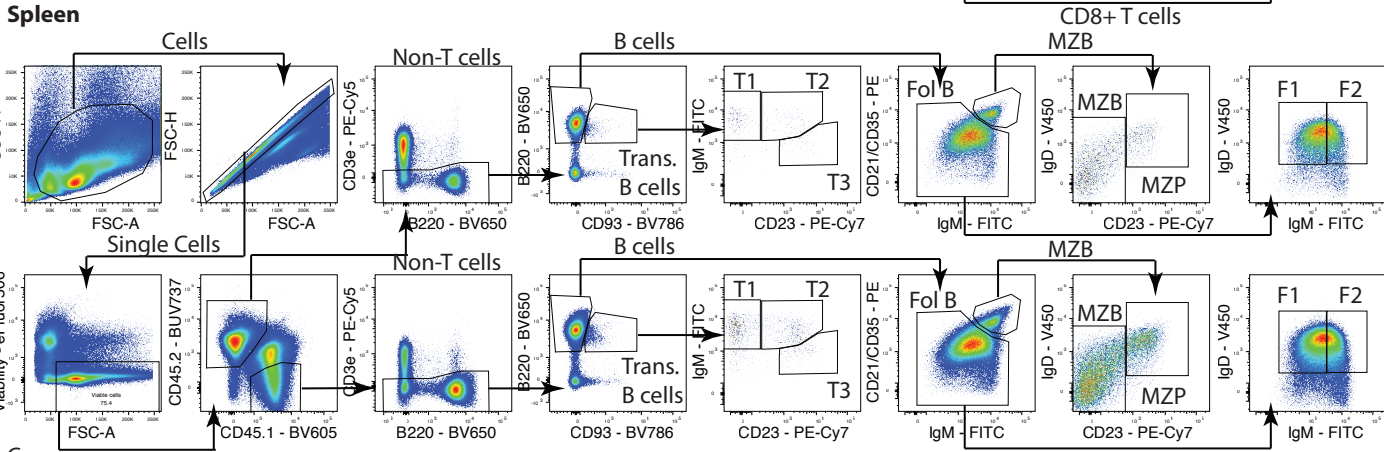

C

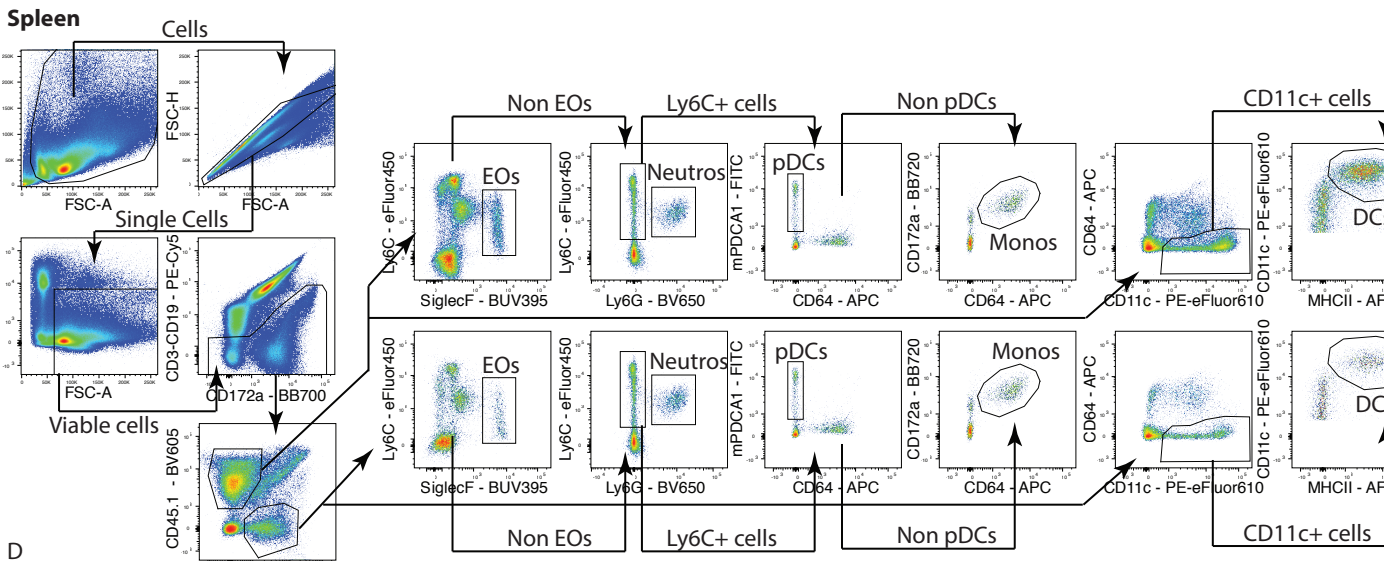

D

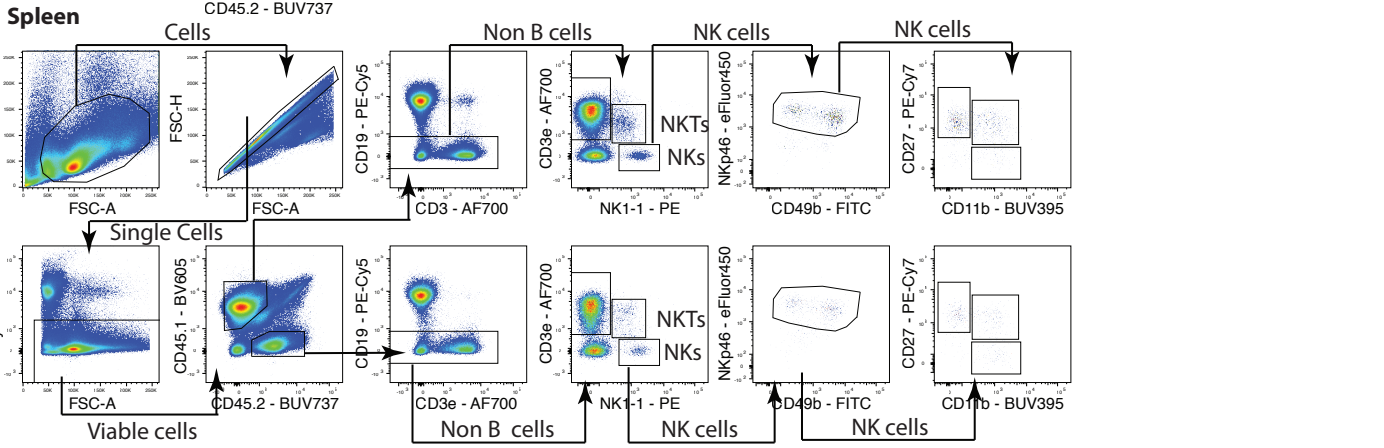

**Supplementary Fig. 10. (A-D)** Gating strategies pertaining to cell populations presented in Figure 5 and Supplementary Figure 5. N: Naive, CM: Central Memory, EM: Effector Memory, Fol: Follicular, MZB: Marginal Zone B cells, MZP: Marginal Zone Plasmablasts, T: Transitional, F: Follicular, EOs: Eosinophils.

**Supplementary Table 1:** PID gene list used for filtering WES data (HLH genes in bold)

| Primary ImmunoDeficiency genes |          |          |          |          |          |          |          |
|--------------------------------|----------|----------|----------|----------|----------|----------|----------|
| <b>PRF1</b>                    | STIM1    | CARD9    | MASP1    | LRRC32   | CDKN1A   | IL15RA   | CFI      |
| <b>UNC13D</b>                  | CARD11   | IL17RA   | MASP2    | P2RX7    | CREBBP   | PTPRC    | CFH      |
| <b>STX11</b>                   | DOCK8    | IL17F    | COLEC11  | PRDM1    | EP300    | CD3D     | CFHR1    |
| <b>STXBP2</b>                  | TYK2     | ACT1     | CD46     | RELA     | ERBB2    | CD3E     | CFHR2    |
| <b>SH2D1A</b>                  | PGM3     | CLEC7A   | CD59     | RELB     | HDAC3    | CD3G     | CFHR3    |
| <b>XIAP</b>                    | CD19     | RORC     | FCN3     | REL      | PTPN2    | CD247    | CFHR4    |
| <b>ITK</b>                     | RHOH     | APOLI    | MBL2     | SH3KBP1  | SP1      | CD8A     | CFHR5    |
| <b>CD27</b>                    | IKZF1    | RPSA     | MEFV     | TCF3     | KPNA1    | ZAP70    | THBD     |
| <b>MAGT1</b>                   | UNC119   | STAT3    | MVK      | TFRC     | RET      | RAG1     | C4B      |
| <b>RAB27A</b>                  | IKKBK    | JAK2     | CIA51    | TGFB1    | MTOR     | RAG2     | CFI      |
| <b>MYO5A</b>                   | CD81     | ITGB2    | NLRP12   | TGFB2    | MAP3K7   | DCLRE1C  | CFH      |
| <b>MLPH</b>                    | TRAC     | FUCT1    | TNFRSF1A | TGFB3    | HDAC1    | ADA      | CFHR1    |
| <b>LYST</b>                    | CTPS1    | FERMT3   | PSTPIP1  | TRAF3IP2 | AR       | AK2      | CFHR2    |
| <b>MUNC13-4</b>                | BCL10    | SLC37A4  | NOD2     | IL22     | NDUFA13  | LIG4     | CFHR3    |
| CR2                            | MAP3K14  | SLC35C1  | LPIN2    | IL17A    | RPTOR    | NHEJ1    | CFHR4    |
| MS4A1                          | DOCK2    | RAC2     | IL1RN    | IRF1     | RICTOR   | PNP      | CFHR5    |
| TNFRSF13B                      | VAV1     | ACTB     | IL36RN   | CCL8     | TP53     | PRKDC    | THBD     |
| TNFRSF13C                      | TRNT1    | FPR1     | SLC29A3  | CCL13    | EIF4EBP1 | LCK      | CREB3L3  |
| TWEAK                          | TAP1     | CTSC     | CARD14   | CLEC4E   | CDK4     | CORO1A   | CREB3L4  |
| BLK                            | TAP2     | CEBPE    | SH3BP2   | CLEC6A   | RPS6KB1  | TNFRSF4  | CREB5    |
| FCGR2A                         | TAPBP    | SBD5     | PSMB8    | STAT5a   | CDK2     | FOXN1    | PRKACA   |
| FCGR1                          | CIITA    | G6PC3    | NLRC4    | IL6      | CDK6     | ORAI1    | PRKACB   |
| CD40LG                         | RFX5     | VPS45    | TMEM173  | IL6R     | MLST8    | NOLA3    | PRKACG   |
| CD40                           | RFXAP    | HAX1     | CECR1    | JAK1     | TAB1     | RTEL1    | PRKAR1A  |
| AICDA                          | RFXANK   | ELANE    | CNOT3    | SOCS3    | EIF4E    | TERC     | PRKAR1B  |
| UNG                            | WAS      | GFI1     | ELF4     | STAT6    | CDKN1B   | TERT     | PRKAR2A  |
| INO80                          | WIPF1    | JAGN1    | MSH5     | BCL10    | SKP2     | TINF2    | CXCR5    |
| IGHG1                          | ATM      | LAMTOR2  | MSH2     | TLR2     | PCNA     | TCN2     | PRKD1    |
| IGKC                           | MRE11A   | TAZ      | MLH1     | TLR6     | CCND2    | SLC46A1  | AKT1     |
| IL21                           | NBN      | VPS13B   | RAD50    | WWP1     | CCND3    | MTHFD1   | APCS     |
| IL21R                          | BLM      | C16ORF57 | MRE11    | PIAS1    | TGFB1    | SPINK5   | BCL6     |
| NFKB1                          | DNMT3B   | CYBB     | BOB1     | MITF     | RORA     | SP110    | PDCD1    |
| NFKB2                          | ZBTB24   | CYBA     | TNFRSF17 | ERAP1    | IL17RC   | TBX1     | CD274    |
| LRBA                           | POLE1    | NCF1     | TNFRSF1A | GAB2     | TRAF6    | DGCR6    | PDCD1LG2 |
| CTLA4                          | PMS2     | NCF2     | TNFRSF18 | IL12A    | RORC     | HRAS     | CD28     |
| PRKCD                          | MCM4     | NCF4     | TNFSF4   | IL6ST    | HIF1A    | AP3B1    | CDX1     |
| PLCG2                          | RNF168   | IKBKG    | TNFSF10  | GRB2     | RORB     | BTK      | CXCL12   |
| PIK3CD                         | CHD7     | NFKBIA   | TNFSF13  | PTPN11   | IGLC2    | IGHM     | IL4I1    |
| PIK3R1                         | SEMA3E   | IRAK4    | TNFSF13B | JAK1     | IRAK1    | CD79A    | IRF4     |
| AIRE                           | RMRP     | MYD88    | VAV2     | WWP2     | VHL      | CD79B    | GAB1     |
| ITCH                           | SMARCAL1 | HOIL1    | RTP4     | SRC      | IKKBK    | IGLL1    | SPRY2    |
| FAS                            | TREX1    | TMC6     | NFKBIA   | MAP2K6   | TGFB2    | BLNK     | EPS15    |
| TNFSF6                         | RNASEH2B | TMC8     | ICOSLG   | CNTF     | EGLN1    | TCF3     | SYK      |
| CASP10                         | RNASEH2C | STAT2    | IFITM1   | HCK      | IFNGR1   | ICOS     | EGF      |
| CASP8                          | RNASEH2A | MCM4     | PIK3AP1  | FOXO1    | HIF1AN   | C4B      | ELK1     |
| FADD                           | SAMHD1   | UNC93B1  | PIK3CA   | PIAS3    | SIRT1    | C2       | MAP2K2   |
| NRAS                           | ADAR1    | TLR3     | PIK3CB   | MAG1     | MDM2     | C3       | SOS2     |
| FOXP3                          | IFNGR1   | TICAM1   | PIK3R2   | SOS1     | TCEB1    | C5       | JAK3     |
| IL2RA                          | IFNGR2   | TRAF3    | PIK3R3   | EGFR     | TCEB2    | C6       | IL7RA    |
| STAT5B                         | IL12RB1  | TBK1     | CLEC16A  | LCP2     | CUL2     | C7       | RAF1     |
| STAT1                          | IL12B    | CXCR4    | CD70     | SOCS1    | INOC1    | C8A      |          |
| STK4                           | ISG15    | RBCK1    | TLR7     | PTPN1    | MBP      | C8G      |          |
| TPP2                           | GATA2    | C1QA     | TLR9     | ESR1     | CXCL12   | C8B      |          |
| IL10RA                         | IRF8     | C1QB     | CD180    | BCAR1    | CD80     | C9       |          |
| IL10RB                         | CSF2RA   | C1QC     | CREB1    | IFNAR1   | CD86     | SERPING1 |          |
| IL10                           | ACP5     | C1R      | CREB3    | CBL      | STAT4    | CFB      |          |
| MALT1                          | DKC1     | C1S      | CREB3L1  | FYB      | NFAT5    | CFD      |          |
| TTC7A                          | NHP2     | C4A      | CREB3L2  | GRAP2    | GATA3    | CFP      |          |
| ADAM17                         | CREB1    | CCND1    | JUN      | MAPK1    | CEBPD    | MAPK3    |          |
| IL2RG                          | JUND     | SHC1     | FOS      | MAP2K1   | NR3C1    | ADAM10   |          |

**Supplementary Table 2** - Comparison of phenotypes of R688\*/R688\* patient and published Roquin-1 (and Roquin-2) transgenic mouse strains

|                                            | <b>R688*/R688*</b>                             | <b>Rc3h1<sup>san/san</sup></b>                                                          | <b>Rc3h1<sup>9t/9t</sup></b>                                                    | <b>Rc3h1<sup>-/-</sup></b>                                                                   | <b>Rc3h1<sup>fl/fl</sup> Vav-Cre</b>       | <b>Rc3h1<sup>fl/fl</sup> CD4-Cre</b> | <b>Rc3h1<sup>fl/fl</sup> CD19-Cre</b> | <b>Rc3h1-2<sup>fl/fl</sup> CD4-Cre</b>                           | <b>Rc3h1<sup>rin/rin</sup></b>                                                | <b>Rc3h1<sup>rin/rin</sup> Lck-Cre</b>                      |
|--------------------------------------------|------------------------------------------------|-----------------------------------------------------------------------------------------|---------------------------------------------------------------------------------|----------------------------------------------------------------------------------------------|--------------------------------------------|--------------------------------------|---------------------------------------|------------------------------------------------------------------|-------------------------------------------------------------------------------|-------------------------------------------------------------|
|                                            | <b>RC3H1 patient</b>                           | <i>saraoque</i> (M199R)                                                                 | gene trap                                                                       | full KO                                                                                      | hematopoietic and endothelial KO           | CD4+T cell KO                        | B cell KO                             | CD4+T cell KO                                                    | Ringless                                                                      | CD4+ and CD8+ T Ringless                                    |
| <b>Reference</b>                           |                                                | Vinuesa et al. Nature. 2005; Linterman et al. Immunity. 2009; Lee et al. Immunity. 2012 | Schaefer et al. PLoS ONE. 2013; Montufar-Solis et al. Scientific Reports. 2014. | Bertossi et al. J Exp Med. 2011                                                              | Bertossi et al. J Exp Med. 2011            | Bertossi et al. J Exp Med. 2011      | Bertossi et al. J Exp Med. 2011       | Vogel et al. Immunity. 2013; Jeltsch et al. Nat. Immunol. 2014.  | Pratama et al. Immunity. 2013                                                 | Pratama et al. Immunity. 2013; Ramiscal et al. eLife. 2015. |
| Survival                                   | 1 sib dead <i>in utero</i>                     | Normal                                                                                  | Poor                                                                            | Perinatal lethal on C57Bl, better survival in CD1 outbred strain                             | Normal                                     | Normal                               | Normal                                | Decreased survival (130 days) due to inflammatory lung pathology | Perinatal lethal (Respiratory distress)                                       | Normal                                                      |
| Mental retardation                         | +                                              | NA                                                                                      | NA                                                                              | NA                                                                                           | NA                                         | NA                                   | NA                                    | NA                                                               | NA                                                                            | NA                                                          |
| Dysmorphism                                | Short stature, Facial dysmorphism, Webbed Neck | Growth defect                                                                           | Curly tail, caudal spine defect                                                 | Developmental pulmonary defect, Caudal spine defect, Growth defect in CD1 outbred background | NA                                         | NA                                   | none                                  | none                                                             | Developmental pulmonary defect (thoracic muscle atrophy), Caudal spine defect | none                                                        |
| <b>Immunological phenotype</b>             |                                                |                                                                                         |                                                                                 |                                                                                              |                                            |                                      |                                       |                                                                  |                                                                               |                                                             |
| Splenomegaly, adenopathy                   | +                                              | +++                                                                                     | +                                                                               | +                                                                                            | +                                          | -                                    | +                                     | +++                                                              | NA                                                                            | NA                                                          |
| Anemia                                     | +++ (during hyperinflammatory episodes)        | +                                                                                       | NA                                                                              | NA                                                                                           | NA                                         | NA                                   | NA                                    | NA                                                               | NA                                                                            | NA                                                          |
| Thrombocytopenia                           | +(during hyperinflammatory episodes)           | +(autoimmune)                                                                           | NA                                                                              | NA                                                                                           | NA                                         | NA                                   | NA                                    | NA                                                               | NA                                                                            | NA                                                          |
| Monocytosis, increased macrophages         | +                                              | +                                                                                       | +                                                                               | +                                                                                            | +                                          | -                                    | -                                     | +                                                                | NA                                                                            | NA                                                          |
| Neutrophilia                               | +                                              | NA                                                                                      | NA                                                                              | -                                                                                            | -                                          | -                                    | -                                     | +                                                                | NA                                                                            | NA                                                          |
| Eosinophilia                               | -                                              | NA                                                                                      | +                                                                               | +                                                                                            | ++                                         | ++                                   | ++                                    | -                                                                | NA                                                                            | NA                                                          |
| Increased Tfh (spleen, LN)                 | -(CXCR5+ CD45RA- CD4+ T)                       | ++                                                                                      | -                                                                               | -                                                                                            | -                                          | -                                    | -                                     | ++                                                               | NA                                                                            | Reduced Tfh (Increased Tfr)                                 |
| Increased Treg                             | ++                                             | ++                                                                                      | ++                                                                              | ++                                                                                           | ++                                         | -                                    | +                                     | +                                                                | NA                                                                            | -                                                           |
| Increased ICOS on CD4 T cells              | +++                                            | ++                                                                                      | ++                                                                              | +++                                                                                          | +++                                        | +++                                  | NA                                    | +++                                                              | NA                                                                            | +                                                           |
| Increased OX40 on CD4 cells                | ++                                             | +                                                                                       | NA                                                                              | NA                                                                                           | NA                                         | +                                    | NA                                    | ++                                                               | NA                                                                            | NA                                                          |
| Increased effector CD4 T cells             | -                                              | ++                                                                                      | NA                                                                              | -                                                                                            | ++                                         | -                                    | ++                                    | ++                                                               | NA                                                                            | NA                                                          |
| Increased effector CD8 T cells             | +(CD4+ CD8+ T, PD1+ CD27- CD8 T)               | +++                                                                                     | ++                                                                              | ++                                                                                           | ++                                         | ++                                   | +                                     | +++                                                              | NA                                                                            | NA                                                          |
| Increased IFNγ+ CD4 T                      | -                                              | ++                                                                                      | NA                                                                              | NA                                                                                           | NA                                         | NA                                   | NA                                    | ++                                                               | NA                                                                            | -                                                           |
| Increased IL-17a+ CD4 T                    | ++                                             | =                                                                                       | NA                                                                              | NA                                                                                           | NA                                         | NA                                   | NA                                    | +++                                                              | NA                                                                            | -                                                           |
| Increased IFNγ+ CD8 T                      | +                                              | NA                                                                                      | ++                                                                              | NA                                                                                           | NA                                         | NA                                   | NA                                    | NA                                                               | NA                                                                            | NA                                                          |
| Expanded circulating B cells               | +++                                            | -                                                                                       | -                                                                               | -                                                                                            | Reduced immature and recirculating B cells | -                                    | ++                                    | Reduced Splenic B cells                                          | NA                                                                            | NA                                                          |
| Impaired B cell maturation                 | +++                                            | NA                                                                                      | -                                                                               | -                                                                                            | ++                                         | -                                    | -                                     | Reduced Follicular and Marginal Zone B cells                     | NA                                                                            | NA                                                          |
| Dysgammaglobulinemia                       | +(IgM, IgG2)                                   | ++ (IgG1, IgG2, IgE)                                                                    | NA                                                                              | NA                                                                                           | ++ (IgG2b, IgG1, IgG3, IgA)                | NA                                   | -                                     | -                                                                | NA                                                                            | NA                                                          |
| <b>Systemic auto-immunity</b>              |                                                |                                                                                         |                                                                                 |                                                                                              |                                            |                                      |                                       |                                                                  |                                                                               |                                                             |
| SLE-like auto-immunity                     | -                                              | +++                                                                                     | =                                                                               | NA                                                                                           | -                                          | -                                    | -                                     | -                                                                | NA                                                                            | NA                                                          |
| Auto-antibodies                            | ANF- RF++                                      | dsDNA ++ RF++                                                                           | NA                                                                              | NA                                                                                           | -                                          | -                                    | -                                     | Directed against pancreatic ags, RF-, ANF-                       | NA                                                                            | NA                                                          |
| Spontaneous germinal centers in LN, spleen | NA                                             | +++                                                                                     | ++                                                                              | NA                                                                                           | ++                                         | -                                    | -                                     | -                                                                | NA                                                                            | NA                                                          |
| Necrotizing hepatitis                      | ++                                             | ++                                                                                      | ++                                                                              | NA                                                                                           | -                                          | -                                    | -                                     | -                                                                | NA                                                                            | NA                                                          |
| Inflammatory bowel disease                 | ?(Chronic diarrhea)                            | ++                                                                                      | ++                                                                              | NA                                                                                           | -                                          | -                                    | -                                     | -                                                                | NA                                                                            | NA                                                          |
| Nephritis                                  | -                                              | ++ (Glomerulonephritis)                                                                 | ++ (Not specified)                                                              | NA                                                                                           | -                                          | -                                    | -                                     | ++                                                               | NA                                                                            | NA                                                          |
| Various organ inflammation                 | -                                              | NA                                                                                      | Lymphocytic pneumonitis                                                         | NA                                                                                           | NA                                         | NA                                   | NA                                    | Interstitial pneumonitis, gastritis                              | NA                                                                            | NA                                                          |
| <b>Inflammation</b>                        |                                                |                                                                                         |                                                                                 |                                                                                              |                                            |                                      |                                       |                                                                  |                                                                               |                                                             |
| Triglycerides                              | ++                                             | NA                                                                                      | NA                                                                              | NA                                                                                           | NA                                         | NA                                   | NA                                    | NA                                                               | NA                                                                            | NA                                                          |
| Ferritin                                   | ++ (during hyperinflammatory episodes)         | NA                                                                                      | NA                                                                              | NA                                                                                           | NA                                         | NA                                   | NA                                    | NA                                                               | NA                                                                            | NA                                                          |
| Soluble CD25                               | ++ (during hyperinflammatory episodes)         | NA                                                                                      | NA                                                                              | NA                                                                                           | NA                                         | NA                                   | NA                                    | NA                                                               | NA                                                                            | NA                                                          |
| Increased inflammatory serum cytokines     | IL-1b, IL-6, IL-10, IL-17a, IL-18, TNFa, IFNγ  | IFNγ, IL-6, TNFa                                                                        | NA                                                                              | NA                                                                                           | NA                                         | NA                                   | NA                                    | IL-6, IL-10, IL-17a, TNFa, (IFNγ Normal)                         | NA                                                                            | IL-21 reduced                                               |
| <b>Hyperinflammatory episodes</b>          | ++                                             | Increased lethality in sepsis model                                                     | NA                                                                              | NA                                                                                           | NA                                         | NA                                   | NA                                    | NA                                                               | NA                                                                            | NA                                                          |

Abbreviations used in the table: NA = not available, ANF = antinuclear factor, RF = rheumatoid factors, SLE = systemic lupus erythematosus.

**Supplementary Table 3 - primer list**

|                                |     |                         |
|--------------------------------|-----|-------------------------|
| <i>RC3H1</i> exon 12           | FWD | AAAGGTTAATTGTGGGGAGGA   |
|                                | REV | GGTCAAACAATGAGAGCCAAT   |
| <i>IL6</i>                     | FWD | GCTGTGCAGATGAGTACAAA    |
|                                | REV | GGCTGGCATTGTGGTT        |
| <i>ICOS</i>                    | FWD | GACCATTCTCATGCCAACTA    |
|                                | REV | CTATGGGTAACCAGAACTTCA   |
| <i>NFKBID</i>                  | FWD | ACCTGCGGACCTTTGTCAAC    |
|                                | REV | CACACGGCTCCTCTTCAACAG   |
| <i>NFKBIZ</i>                  | FWD | GTGTTCTGGGTAAAGAACTCA   |
|                                | REV | TGTTCTATGTTTACACCTTGT   |
| <i>REL</i>                     | FWD | ACCTTCTGACCAGGAAGTTA    |
|                                | REV | GATCCTGGCACAGTTTCTG     |
| <i>TNF</i>                     | FWD | CCTCTCTAATCAGCCCTCTG    |
|                                | REV | GAGGACCTGGGAGTAGATGAG   |
| <i>IFN<math>\gamma</math></i>  | FWD | TCGGTAACTGACTTGAATGTCCA |
|                                | REV | TCGCTTCCCTGTTTTAGCTGC   |
| <i>GAPDH</i>                   | FWD | TGCACCACCAACTGCTTAGC    |
|                                | REV | GGCATGGACTGTGGTCATGAG   |
| <i>TBP</i>                     | FWD | CGGCTGTTTAACTTCGCTTC    |
|                                | REV | CACACGCCAAGAAACAGTGA    |
| <i>HPRT</i>                    | FWD | TGACACTGGCAAACAATGCA    |
|                                | REV | GGTCCTTTTCACCAGCAAGCT   |
| <i>Icos (polyA tail assay)</i> | FWD | gtcacgctgatgtttcttcag   |
|                                | REV | ttattggctgttcaggagcag   |

**Supplementary Table 4 - Flowcytometry antibodies**  
**Human panels**

| <i>Epitope</i> | <i>Clone</i> | <i>Fluorochrome</i> | <i>Company</i> | <i>Catalogue Number</i> | <i>Dilution</i> |
|----------------|--------------|---------------------|----------------|-------------------------|-----------------|
| CD11b          | ICRF44       | BV480               | BD Biosciences | 746704                  | 2.5 $\mu$ L     |
| CD11c          | B-Ly6        | BV650               | BD Biosciences | 563404                  | 0.625 $\mu$ L   |
| CD123          | 32703        | BB630-P             | BD Biosciences | Custom developed        | 2.5 $\mu$ L     |
| CD127          | HIL-7R-M21   | BUV737              | BD Biosciences | 564300                  | 2.5 $\mu$ L     |
| CD14           | M5E2         | BV750               | BD Biosciences | 746920                  | 1.25 $\mu$ L    |
| CD16           | 3G8          | BV570               | Biologend      | 302036                  | 1.25 $\mu$ L    |
| CD183          | 1C6          | AF488               | BD Biosciences | 561730                  | 1.25 $\mu$ L    |
| CD185          | J252D4       | BV421               | Biologend      | 356920                  | 1.25 $\mu$ L    |
| CD194          | L291H4       | PE                  | Biologend      | 359412                  | 1.25 $\mu$ L    |
| CD196          | 11A9         | BUV496              | BD Biosciences | 564659                  | 2.5 $\mu$ L     |
| CD197          | 3D12         | BUV615-P            | BD Biosciences | Custom developed        | 2.5 $\mu$ L     |
| CD20           | 2H7          | BB700               | BD Biosciences | 745889                  | 0.625 $\mu$ L   |
| CD24           | ML5          | BUV395              | BD Biosciences | 563818                  | 1.25 $\mu$ L    |
| CD25           | 2A3          | BUV563              | BD Biosciences | 565699                  | 5 $\mu$ L       |
| CD27           | O323         | PE-Cy7              | Biologend      | 302838                  | 1.25 $\mu$ L    |
| CD38           | HIT2         | APC-R700            | BD Biosciences | 564979                  | 1.25 $\mu$ L    |
| CD3e           | UCHT1        | BV711               | Biologend      | 300464                  | 1.25 $\mu$ L    |
| CD4            | SK3          | BUV805              | BD Biosciences | 564910                  | 5 $\mu$ L       |
| CD45RA         | HI100        | APC                 | Biologend      | 304112                  | 1.25 $\mu$ L    |
| CD56           | NCAM16-2     | BB790-P             | BD Biosciences | Custom developed        | 1.25 $\mu$ L    |
| CD8            | RPA-T8       | BV786               | BD Biosciences | 563823                  | 0.625 $\mu$ L   |
| CRTH2          | BM16         | APC-Cy7             | Biologend      | 350114                  | 2.5 $\mu$ L     |
| FoxP3          | PCH101       | APC                 | Thermofisher   | 17-4776-42              | 0.5 $\mu$ L     |
| HLA-DR         | G46-6        | BUV661              | BD Biosciences | 565073                  | 1.25 $\mu$ L    |
| ICOS           | C398.4A      | APC                 | Thermofisher   | 17-9949-82              | 0.25 $\mu$ L    |
| IFNg           | B27          | FITC                | BD Biosciences | 552887                  | 1 $\mu$ L       |
| IgD            | IA6-2        | BV605               | Biologend      | 348232                  | 1.25 $\mu$ L    |
| IL-17A         | eBio64DEC17  | APC                 | Thermofisher   | 17-7179-42              | 5 $\mu$ L       |
| OX40           | ACT35        | APC                 | Biologend      | 350008                  | 1 $\mu$ L       |
| PD1            | EH12.1       | BB660-P             | BD Biosciences | Custom developed        | 2.5 $\mu$ L     |
| Streptavidin   |              | PE-Cy5              | BD Biosciences | 554062                  | 0.625 $\mu$ L   |
| TCR gd         | B1           | BUV395              | BD Biosciences | 745681                  | 5 $\mu$ L       |
| Va24-Ja18      | 6B12         | Biotin              | Thermofisher   | 13-5806-82              | 5 $\mu$ L       |
| Va7.2          | 3C10         | BV605               | Biologend      | 351720                  | 5 $\mu$ L       |
| XCR1           | S15046E      | APC-Fire750         | Biologend      | 372608                  | 2.5 $\mu$ L     |

**Mouse panels**

| <i>Epitope</i> | <i>Clone</i> | <i>Fluorochrome</i> | <i>Company</i> | <i>Catalogue Number</i> | <i>Dilution</i> |
|----------------|--------------|---------------------|----------------|-------------------------|-----------------|
| anti-goat      | Polyclonal   | AF647               | ThermoFisher   | A-21447                 | 1 in 1000       |
| B220           | RA3-6B2      | BV650               | BD Biosciences | 563893                  | 1 in 200        |
| CD115          | AFS98        | PE                  | ThermoFisher   | 12-1152-82              | 1 in 400        |
| CD11b          | M1/70        | BUV395              | BD Biosciences | 563553                  | 1 in 200        |
| CD11b          | M1/70        | APC-eFluor780       | ThermoFisher   | 47-0112-82              | 1 in 200        |
| CD11c          | N418         | PE-eFluor610        | ThermoFisher   | 61-0114-82              | 1 in 500        |
| CD11c          | N418         | PE-Cy7              | ThermoFisher   | 25-0114-82              | 1 in 500        |
| CD134          | OX-86        | PE                  | Thermofisher   | 12-1341-82              | 1 in 100        |
| CD16/32        | 2.4G2        | Unconjugated        | In-house       | N/A                     | 1 in 400        |
| CD16/32        | 2.4G2        | PE                  | BD Biosciences | 561727                  | 1 in 200        |
| CD161          | PK136        | PE                  | Biologend      | 108753                  | 1 in 300        |
| CD19           | eBio1D3      | PE-Cy5              | ThermoFisher   | 15-0193-82              | 1 in 500        |
| CD21/35        | 7G6          | PE                  | BD Biosciences | 552957                  | 1 in 200        |
| CD23           | B3B4         | PE-Cy7              | ThermoFisher   | 25-0232-82              | 1 in 200        |
| CD26           | H194-112     | FITC                | BD Biosciences | 559652                  | 1 in 100        |
| CD27           | LG.7F9       | PE-Cy7              | ThermoFisher   | 25-0271-82              | 1 in 300        |
| CD279          | RMP1-30      | PE-Cy7              | Biologend      | 109110                  | 1 in 500        |

Mouse panels - continued

| <i>Epitope</i> | <i>Clone</i> | <i>Fluorochrome</i> | <i>Company</i>    | <i>Catalogue Number</i> | <i>Dilution</i> |
|----------------|--------------|---------------------|-------------------|-------------------------|-----------------|
| CD3            | 145-2C11     | BUV737              | BD Biosciences    | 612771                  | 1 in 200        |
| CD3            | 145-2C11     | BV510               | BD Biosciences    | 563024                  | 1 in 100        |
| CD3            | 145-2C11     | APC-Cy7             | BD Biosciences    | 557596                  | 1 in 50         |
| CD3            | 145-2C11     | PE-Cy5              | ThermoFisher      | 15-0031-82              | 1 in 300        |
| CD3            | 17A2         | AF700               | ThermoFisher      | 56-0032-82              | 1 in 150        |
| CD335          | 29A1.4       | eFluor450           | ThermoFisher      | 48-3351-82              | 1 in 50         |
| CD38           | 90           | AF700               | ThermoFisher      | 56-0381-82              | 1 in 200        |
| CD4            | GK1,5        | APC-Cy7             | BD Biosciences    | 552051                  | 1 in 200        |
| CD44           | IM7          | red Fluor710        | Tonbo Biosciences | TONB80-0441-U100        | 1 in 200        |
| CD45           | 30-F11       | AF700               | ThermoFisher      | 56-0451-82              | 1 in 400        |
| CD45.1         | A20          | BV605               | Biolegend         | 110738                  | 1 in 200        |
| CD45.2         | 104          | BUV737              | BD Biosciences    | 564880                  | 1 in 400        |
| CD62L          | MEL-14       | FITC                | ThermoFisher      | 11-0621-82              | 1 in 200        |
| CD64           | X54-5/7.1    | BV711               | Biolegend         | 139311                  | 1 in 100        |
| CD64           | X54-5/7.1    | AF647               | BD Biosciences    | 558539                  | 1 in 300        |
| CD8            | 53-6.7       | PE-Cy7              | ThermoFisher      | 25-0081-82              | 1 in 400        |
| CD8            | 53-6.7       | eFluor450           | ThermoFisher      | 48-0081-82              | 1 in 400        |
| CD93           | AA4.1        | Biotin              | ThermoFisher      | 13-5892-82              | 1 in 50         |
| Clec4F         | Polyclonal   | Goat                | Bio-Techne        | AF2784                  | 1 in 100        |
| cRel           | 1RELAH5      | PE                  | ThermoFisher      | 12-6111-80              | 1 in 100        |
| CTLA4          | UC10-4F10-11 | APC                 | BD Biosciences    | 564331                  | 1 in 100        |
| CXCR5          | 2G8          | Biotin              | BD Biosciences    | 551960                  | 1 in 50         |
| F4/80          | BM8          | BV785               | Biolegend         | 123141                  | 1 in 100        |
| FoxP3          | FJK-16s      | APC                 | ThermoFisher      | 17-5773-82              | 1 in 300        |
| ICOS           | C398.4A      | PerCP-Cy5-5         | Biolegend         | 313518                  | 1 in 400        |
| ICOS           | C398.4A      | APC                 | ThermoFisher      | 17-9949-82              | 1 in 400        |
| IgD            | 11-26c.2a    | V450                | BD Biosciences    | 560869                  | 1 in 200        |
| IgM            | II/41        | FITC                | BD Biosciences    | 553437                  | 1 in 200        |
| IL-17A         | TC11-18H10.1 | PE                  | Biolegend         | 506904                  | 1 in 200        |
| IL-2           | JES6-5H4     | APC                 | ThermoFisher      | 17-7021-82              | 1 in 200        |
| Ly6-C          | HK1.4        | eFluor450           | ThermoFisher      | 48-5932-82              | 1 in 500        |
| Ly6-G          | 1A8          | BV650               | BD Biosciences    | 740554                  | 1 in 500        |
| MHCII          | M5/114,15,2  | AF700               | ThermoFisher      | 56-5321-82              | 1 in 500        |
| mPDCA1         | 120g8        | FITC                | In-house          | N/A                     | 1 in 200        |
| Rck            | Polyclonal   | Unconjugated        | Bethyl            | A300-461A               | 1 in 100        |
| Ox40           | OX-86        | PE                  | ThermoFisher      | 12-1341-81              | 1 in 200        |
| Siglec F       | E50-2440     | BUV395              | BD Biosciences    | 740280                  | 1 in 200        |
| Streptavidin   |              | BV786               | BD Biosciences    | 563858                  | 1 in 200        |
| TCR gd         | GL3          | FITC                | BD Biosciences    | 561996                  | 1 in 300        |
| Tim-4          | 54(RMT4-54)  | PerCP-eFluor710     | ThermoFisher      | 46-5866-82              | 1 in 200        |
| TNFalpha       | MP6-XT22     | PE                  | ThermoFisher      | 12-7321-82              | 1 in 200        |
| XCR1           | ZET          | BV510               | Biolegend         | 148218                  | 1 in 400        |
